# Supplementary material for: Lignocellulose conversion for biofuel: a new pretreatment greatly improves downstream biocatalytic hydrolysis of various lignocellulosic materials
Source: Springer Nature journal article supplement (doi:10.1186/s13068-015-0419-4), 2015-12-01
Supplement: 13068_2015_419_MOESM7_ESM.pdf [file 13068_2015_419_MOESM7_ESM.pdf]

# Additional file 7: Figure S7

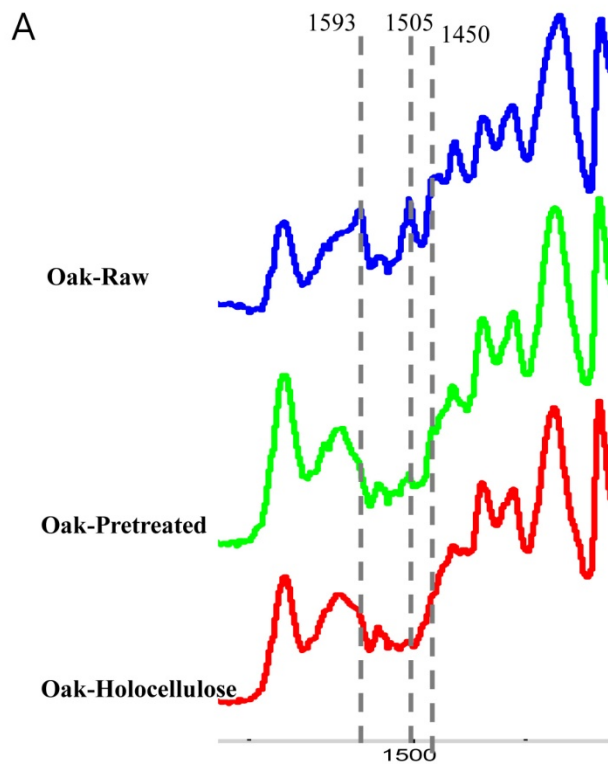

|      |                                                                        |
|------|------------------------------------------------------------------------|
| 1450 | C-H deformation: aromatic skeletal vibration of benzene ring in lignin |
| 1505 | aromatic skeletal vibration of benzene ring in lignin                  |
| 1593 | C=O stretching conjugated to the aromatic ring                         |

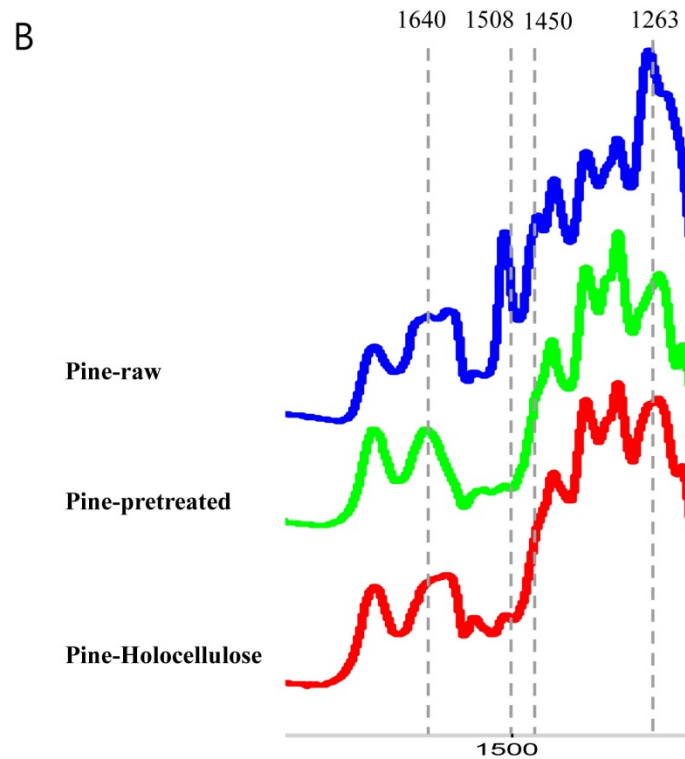

| Band, cm-1 | Assignment                                                                                           |
|------------|------------------------------------------------------------------------------------------------------|
| 1263       | G ring breathing with carbonyl stretching                                                            |
| 1450       | C-H deformation in lignin                                                                            |
| 1508       | aromatic skeletal vibrations in lignin                                                               |
| 1640       | conjugated C=O stretch, Oxidation of component (Zhao, J chem technol biotechnolog 83:950-956 (2008)) |
