# Supplementary material for: Lignocellulose conversion for biofuel: a new pretreatment greatly improves downstream biocatalytic hydrolysis of various lignocellulosic materials
Source: Springer Nature journal article supplement (doi:10.1186/s13068-015-0419-4), 2015-12-01

# Additional file 8: Figure S8

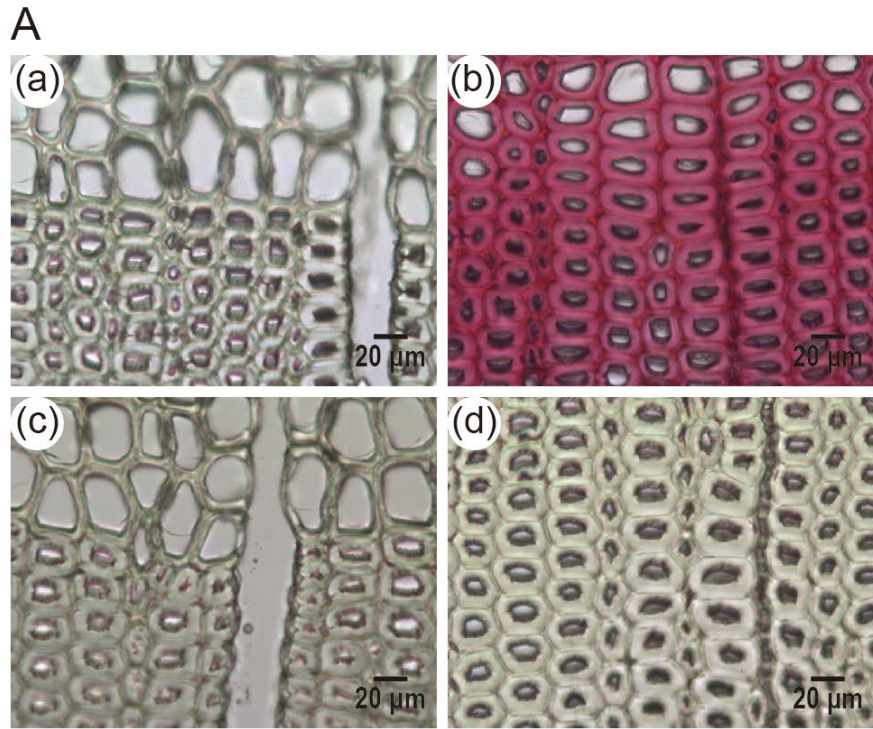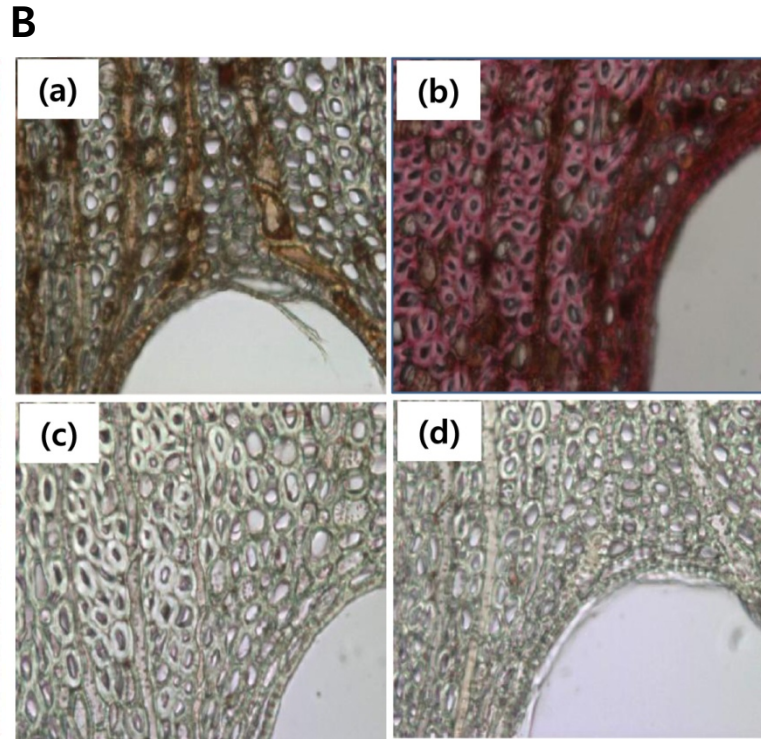

Supplement: 13068_2015_419_MOESM8_ESM.pdf [file 13068_2015_419_MOESM8_ESM.pdf]
